# Supplementary material
Source: PubMed Central journal article supplement (PMC4151176)
Supplement: NIHMS481702-supplement-01.pdf [file NIHMS481702-supplement-01.pdf]

## Appendix 1 (Supplementary): Brain Recovery Core standardized assessment battery

**Motor Domain**Minimal Battery Requirement

- Motricity Index\*†‡
- Modified Ashworth Scale (elbow & ankle) †‡
- Somatosensation (palm & foot) \*†‡
- Berg Balance Scale\*†‡
- 10m Walk Test\*†‡
- 6 Minute Walk Test†‡
- FIM Items\*†‡

**Cognitive Domain**Minimal Battery Requirement

- Short Blessed Test \*†‡
- Unstructured Mesulam Cancellation\*†‡
- Catherine Bergego Scale†
- BIT Article Reading†‡
- Trail-Making Test\*†
- Executive Function Performance Test (bill paying) **or** Performance Assessment of Self-Care Skills (one subtest) ‡
- Canadian Occupational Performance Measure (three goals) ‡
- FIM Items\*†‡

If Pass SBT

- Rey Auditory Verbal Learning\*†‡
- W-J Retrieval Fluency Test\*†‡
- W-J Spatial Relations Test\*†‡
- W-J Numbers Reversed Test\*†‡

**Language Domain**Minimal Battery Requirement

- Boston Naming Test \*†‡
- Limb Apraxia Screen\*
- Mann Assessment of Swallowing Ability\*†‡
- FIM Items†

If Fail BNT

Western Aphasia  
Battery\*†‡

If Fail WAB

- BDAE Aesop's Discourse Production Probe†‡
- Discourse Comprehension Test†‡
- Communication Effectiveness Index†‡

\*Assessment administered at the acute facility

†Assessment administered at IRF

‡Assessment administered at outpatient facility

BDAE = Boston Diagnostic Aphasia Evaluation

BIT = Behavioral Inattention Test

BNT = Boston Naming Test

FIM = Functional Independence Measure

SBT = Short Blessed Test

WAB = Western Aphasia Battery

W-J = Woodcock-Johnson Test

As participants travel from the acute facility, IRF, and outpatient facility the standardized assessments vary to reflect patient needs at different stages across the post-stroke rehabilitation continuum.
